# Supplementary material for: Plasmonic Effect of Ag/Au Composite Structures on the Material Transition
Source: MDPI journal article supplement (doi:10.3390/nano12172927), 2022-08-25
Supplement: s1 [file s1]

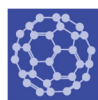

## Supplementary Materials

# Plasmonic Effect of Ag/Au Composite Structures on the Material Transition

Xiaohua Wang <sup>1</sup>, Chengyun Zhang <sup>2</sup>, Xilin Zhou <sup>1</sup>, Zhengkun Fu <sup>1</sup>, Lei Yan <sup>1</sup>, Jinping Li <sup>1,\*</sup>, Zhenglong Zhang <sup>1</sup> and Hairong Zheng <sup>1,\*</sup>

<sup>1</sup> School of Physics and Information Technology, Shaanxi Normal University, Xi'an 710119, China

<sup>2</sup> School of Electronic Engineering, Xi'an University of Posts & Telecommunications, Xi'an 710121, China

\* Correspondence: ljping@snnu.edu.cn (J.L.); hrzheng@snnu.edu.cn (H.Z.)

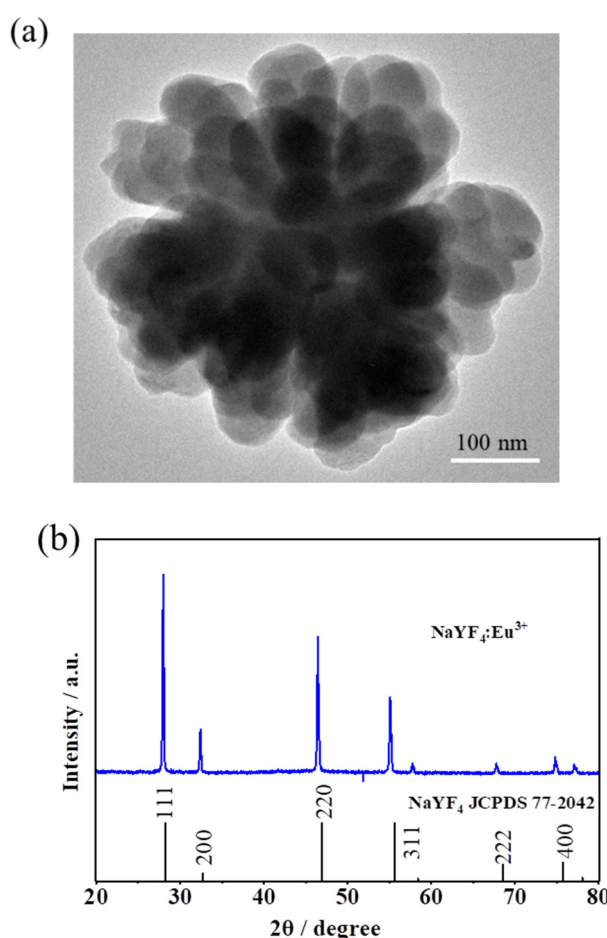

**Citation:** Wang, X.; Zhang, C.; Zhou, X.; Fu, Z.; Yan, L.; Li, J.; Zhang, Z.; Zheng, H. Plasmonic Effect of Ag/Au Composite Structures on the Material Transition. *Nanomaterials* **2022**, *12*, 2927. <https://doi.org/10.3390/nano12172927>

Academic Editor: Vincenzo Vaiano

Received: 28 July 2022

Accepted: 22 August 2022

Published: 25 August 2022

**Publisher's Note:** MDPI stays neutral with regard to jurisdictional claims in published maps and institutional affiliations.

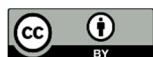

**Copyright:** © 2022 by the authors. Submitted for possible open access publication under the terms and conditions of the Creative Commons Attribution (CC BY) license (<https://creativecommons.org/licenses/by/4.0/>).

**Figure S1.** (a) Transmission electron microscopy (TEM) characterization of NaYF<sub>4</sub>:Eu<sup>3+</sup> nanoflowers; (b) XRD pattern of NaYF<sub>4</sub>:Eu<sup>3+</sup> and standard pattern of cubic NaYF<sub>4</sub>.

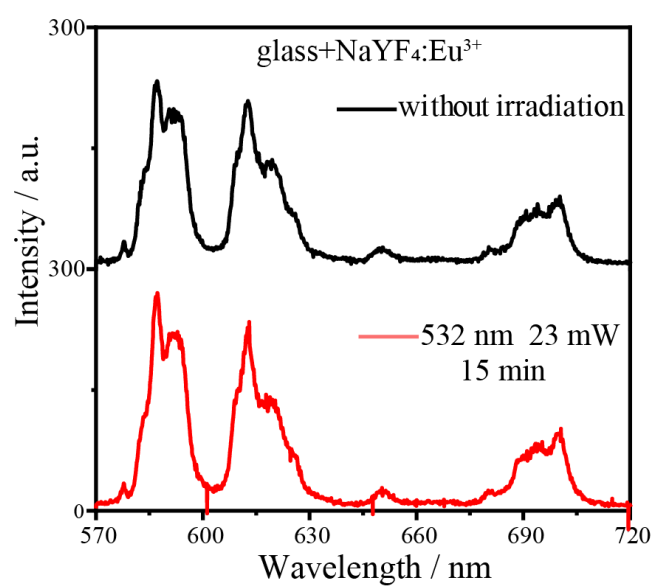

**Figure S2.** In-situ luminescence spectra of NaYF<sub>4</sub>:Eu<sup>3+</sup> on glass irradiated with 532 nm laser irradiation.

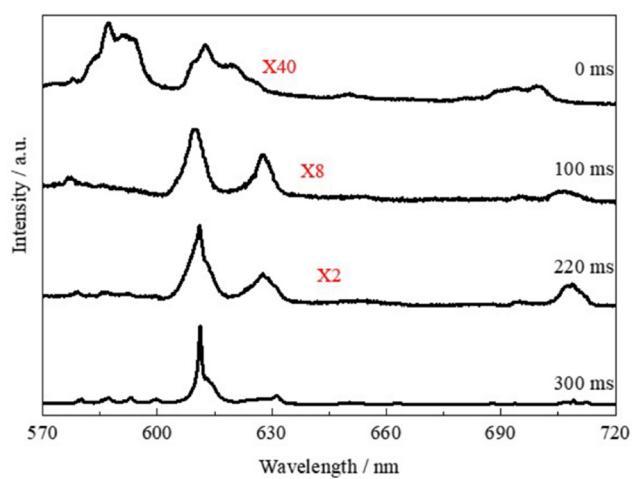

**Figure S3.** Evolution of the luminescence spectra for crystal transformation Ag NIs/Au thin film substrate, under 532 nm laser irradiation (22.5 mW at the sample).
